# Supplementary material for: Solar cycle response and long‐term trends in the mesospheric metal layers
Source: PubMed Central journal article supplement (PMC6680104; doi:10.1002/2016ja022522), 2016-07-27

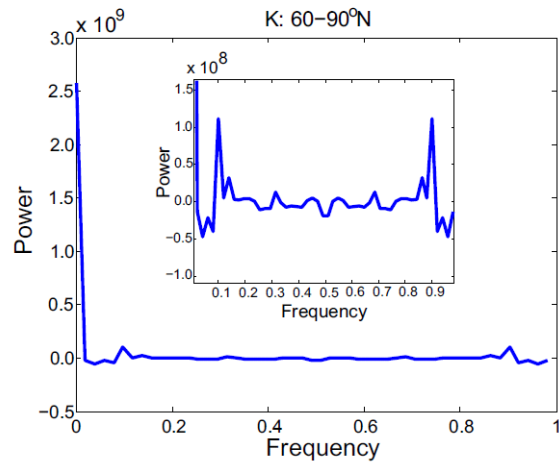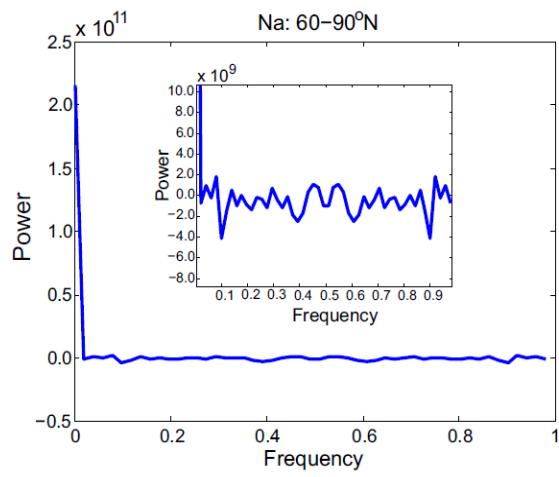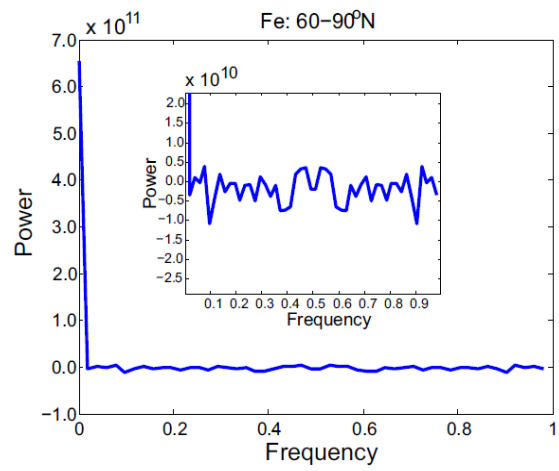

Supplement: JGRA-121-7153-s002.pdf [file JGRA-121-7153-s002.pdf]
